# Supplementary material for: Real-world data for a CDK4/6 inhibitor, Palbociclib, as 1st- or 2nd-line therapy in HR+/HER2− metastatic breast cancer: A multicenter prospective cohort study
Source: Research Square preprint supplement (doi:10.21203/rs.3.rs-8764760/v1), 2026-02-16
Supplement: Supplementary file 1 [file 94662c5f9c77be57eb935a4b.docx]

**Real-world effectiveness of palbociclib in HR+/HER2− metastatic breast cancer: A multicenter prospective cohort study**

Supplementary Information

The tables in the supplementary information provide additional details of the study. These details include the specific anticancer agents used (Supplementary Table 1), the adverse events (Supplementary Table 2), and the doses of palbociclib (Supplementary Table 3) in each cohort.

Supplementary Table 1. Use of anti-hormone agents in combination with PAL

| Agent | Cohort A | Cohort B | Cohort C |
| --- | --- | --- | --- |
| N=246 | N=282 | N=65 |
| Tamoxifen | 3 (1.2%) | 2 (0.7%) | 1 (1.5%) |
| Anastrozole | 10 4.1%) | 8 (2.8%) | 11 (16.9%) |
| Letrozole | 179 (72.8%) | 58 (20.6%) | 20 (30.8%) |
| Exemestane | 2 (0.8%) | 11 (3.9%) | 5 (7.7%) |
| Medroxyprogesterone | 0 (0.0%) | 0 (0.0%) | 1 (1.5%) |
| Fulvestrant | 52 (21.1%) | 203 (72.0%) | 27 (41.5%) |

Data are shown as n (%)

Supplementary Table 2. Adverse events in cohorts A, B and C

| Adverse Event | Cohort | G0 | G0s | G1 | G1s | G2 | G2s | G3 | G3s | G4 | N/A |
| --- | --- | --- | --- | --- | --- | --- | --- | --- | --- | --- | --- |
| Alopecia | A | 6 (2.4%) | 175 (71.1%) | 58 (23.6%) | 1 (0.4%) | 2 (0.8%) | 2 (0.8%) | 0 | 0 | 0 | 2 (0.8%) |
|  | B | 4 (1.4%) | 220 (78.0%) | 47 (16.7%) | 5 (1.8%) | 4 (1.4%) | 0 | 0 | 0 | 0 | 2 (0.7%) |
|  | C | 2 (3.1%) | 45 (69.2%) | 16 (24.6%) | 0 | 0 | 0 | 0 | 0 | 0 | 2 (3.1%) |
| Arthralgia | A | 7 (2.8%) | 180 (73.2%) | 37 (15.0%) | 9 (3.7%) | 10 (4.1%) | 1 (0.4%) | 0 | 0 | 0 | 2 (0.8%) |
|  | B | 7 (2.5%) | 218 (77.3%) | 36 (12.8%) | 9 (3.2%) | 7 (2.5%) | 2 (0.7%) | 1 (0.4%) | 0 | 0 | 2 (0.7%) |
|  | C | 6 (9.2%) | 51 (78.5%) | 2 (3.1%) | 3 (4.6%) | 0 | 0 | 0 | 1 (1.5%) | 0 | 2 (3.1%) |
| Constipation | A | 6 (2.4%) | 172 (69.9%) | 44 (17.9%) | 7 (2.8%) | 12 (4.9%) | 1 (0.4%) | 1 (0.4%) | 1 (0.4%) | 0 | 2 (0.8%) |
|  | B | 7 (2.5%) | 225 (79.8%) | 32 (11.3%) | 3 (1.1%) | 8 (2.8%) | 4 (1.4%) | 1 (0.4%) | 0 | 0 | 2 (0.7%) |
|  | C | 3 (4.6%) | 55 (84.6%) | 5 (7.7%) | 0 | 0 | 0 | 0 | 0 | 0 | 2 (3.1%) |
| Diarrhea | A | 4 (1.6%) | 203 (82.5%) | 29 (11.8%) | 3 (1.2%) | 4 (1.6%) | 0 | 1 (0.4%) | 0 | 0 | 2 (0.8%) |
|  | B | 3 (1.1%) | 236 (83.7%) | 30 (10.6%) | 7 (2.5%) | 3 (1.1%) | 0 | 1 (0.4%) | 0 | 0 | 2 (0.7%) |
|  | C | 1 (1.5%) | 50 (76.9%) | 9 (13.8%) | 0 | 3 (4.6%) | 0 | 0 | 0 | 0 | 2 (3.1%) |
| Hot flash | A | 2 (0.8%) | 217 (88.2%) | 16 (6.5%) | 6 (2.4%) | 3 (1.2%) | 0 | 0 | 0 | 0 | 2 (0.8%) |
|  | B | 1 (0.4%) | 248 (87.9%) | 23 (8.2%) | 7 (2.5%) | 1 (0.4%) | 0 | 0 | 0 | 0 | 2 (0.7%) |
|  | C | 1 (1.5%) | 57 (87.7%) | 1 (1.5%) | 2 (3.1%) | 1 (1.5%) | 1 (1.5%) | 0 | 0 | 0 | 2 (3.1%) |
| Insomnia | A | 7 (2.8%) | 202 (82.1%) | 19 (7.7%) | 12 (4.9%) | 3 (1.2%) | 1 (0.4%) | 0 | 0 | 0 | 2 (0.8%) |
|  | B | 5 (1.8%) | 234 (83.0%) | 23 (8.2%) | 10 (3.5%) | 6 (2.1%) | 2 (0.7%) | 0 | 0 | 0 | 2 (0.7%) |
|  | C | 3 (4.6%) | 56 (86.2%) | 0 | 3 (4.6%) | 0 | 0 | 1 (1.5%) | 0 | 0 | 2 (3.1%) |
| Fatigue | A | 10 (4.1%) | 129 (52.4%) | 71 (28.9%) | 20 (8.1%) | 11 (4.5%) | 3 (1.2%) | 0 | 0 | 0 | 2 (0.8%) |
|  | B | 4 (1.4%) | 148 (52.5%) | 81 (28.7%) | 22 (7.8%) | 25 (8.9%) | 0 | 0 | 0 | 0 | 2 (0.7%) |
|  | C | 3 (4.6%) | 36 (55.4%) | 15 (23.1%) | 4 (6.2%) | 4 (6.2%) | 1 (1.5%) | 0 | 0 | 0 | 2 (3.1%) |
| Oral mucositis | A | 0 | 176 (71.5%) | 50 (20.3%) | 2 (0.8%) | 14 (5.7%) | 0 | 1 (0.4%) | 0 | 1 (0.4%) | 2 (0.8%) |
|  | B | 1 (0.4%) | 191 (67.7%) | 71 (25.2%) | 2 (0.7%) | 14 (5.0%) | 0 | 1 (0.4%) | 0 | 0 | 2 (0.7%) |
|  | C | 1 (1.5%) | 52 (80.0%) | 7 (10.8%) | 0 | 2 (3.1%) | 0 | 1 (1.5%) | 0 | 0 | 2 (3.1%) |
| Nausea | A | 2 (0.8%) | 203 (82.5%) | 31 (12.6%) | 3 (1.2%) | 5 (2.0%) | 0 | 0 | 0 | 0 | 2 (0.8%) |
|  | B | 1 (0.4%) | 226 (80.1%) | 41 (14.5%) | 3 (1.1%) | 5 (1.8%) | 1 (0.4%) | 3 (1.1%) | 0 | 0 | 2 (0.7%) |
|  | C | 0 | 52 (80.0%) | 7 (10.8%) | 0 | 3 (4.6%) | 0 | 1 (1.5%) | 0 | 0 | 2 (3.1%) |
| Pain | A | 20 (8.1%) | 148 (60.2%) | 35 (14.2%) | 23 (9.3%) | 9 (3.7%) | 7 (2.8%) | 1 (0.4%) | 1 (0.4%) | 0 | 2 (0.8%) |
|  | B | 19 (6.7%) | 195 (69.1%) | 29 (10.3%) | 20 (7.1%) | 12 (4.3%) | 4 (1.4%) | 1 (0.4%) | 0 | 0 | 2 (0.7%) |
|  | C | 6 (9.2%) | 44 (67.7%) | 7 (10.8%) | 2 (3.1%) | 2 (3.1%) | 1 (1.5%) | 1 (1.5%) | 0 | 0 | 2 (3.1%) |
| Rash | A | 1 (0.4%) | 201 (81.7%) | 32 (13.0%) | 0 | 10 (4.1%) | 0 | 0 | 0 | 0 | 2 (0.8%) |
|  | B | 2 (0.7%) | 235 (83.3%) | 31 (11.0%) | 3 (1.1%) | 9 (3.2%) | 0 | 0 | 0 | 0 | 2 (0.7%) |
|  | C | 1 (1.5%) | 50 (76.9%) | 10 (15.4%) | 1 (1.5%) | 1 (1.5%) | 0 | 0 | 0 | 0 | 2 (3.1%) |
| Vaginal discharge | A | 2 (0.8%) | 235 (95.5%) | 6 (2.4%) | 1 (0.4%) | 0 | 0 | 0 | 0 | 0 | 2 (0.8%) |
|  | B | 0 | 271 (96.1%) | 8 (2.8%) | 1 (0.4%) | 0 | 0 | 0 | 0 | 0 | 2 (0.7%) |
|  | C | 2 (3.1%) | 61 (93.8%) | 0 | 0 | 0 | 0 | 0 | 0 | 0 | 2 (3.1%) |
| Vaginal dryness | A | 0 | 236 (95.9%) | 8 (3.3%) | 0 | 0 | 0 | 0 | 0 | 0 | 2 (0.8%) |
|  | B | 0 | 270 (95.7%) | 8 (2.8%) | 1 (0.4%) | 1 (0.4%) | 0 | 0 | 0 | 0 | 2 (0.7%) |
|  | C | 0 | 63 (96.9%) | 0 | 0 | 0 | 0 | 0 | 0 | 0 | 2 (3.1%) |
| Vomiting | A | 0 | 233 (94.7%) | 9 (3.7%) | 0 | 2 (0.8%) | 0 | 0 | 0 | 0 | 2 (0.8%) |
|  | B | 0 | 260 (92.2%) | 17 (6.0%) | 2 (0.7%) | 0 | 0 | 1 (0.4%) | 0 | 0 | 2 (0.7%) |
|  | C | 1 (1.5%) | 59 (90.8%) | 1 (1.5%) | 0 | 1 (1.5%) | 0 | 1 (1.5%) | 0 | 0 | 2 (3.1%) |

Data are shown as n (%). N/A: Cases with unknown grade since baseline

Supplementary Table 3. Doses of PAL in different treatment cycles for cohorts A, B and C

| Cycle | Cohort | N | 125 mg/day | 100 mg/day | 75 mg/day | 50 mg/day | * |
| --- | --- | --- | --- | --- | --- | --- | --- |
| 1 | A | 246 | 180 (73.2%) | 50 (20.3%) | 16 (6.5%) | 0 (0.0%) | 0 (0.0%) |
|  | B | 282 | 221 (78.4%) | 45 (16.0%) | 16 (5.7%) | 0 (0.0%) | 0 (0.0%) |
|  | C | 65 | 48 (73.8%) | 12 (18.5%) | 5 (7.7%) | 0 (0.0%) | 0 (0.0%) |
|  | Total | 593 | 449 (75.7%) | 107 (18.0%) | 37 (6.2%) | 0 (0.0%) | 0 (0.0%) |
| 2 | A | 234 | 84 (35.9%) | 107 (45.7%) | 34 (14.5%) | 4 (1.7%) | 5 (2.1%) |
|  | B | 268 | 110 (41.0%) | 111 (41.4%) | 40 (14.9%) | 4 (1.5%) | 3 (1.1%) |
|  | C | 62 | 17 (27.4%) | 32 (51.6%) | 11 (17.7%) | 2 (3.2%) | 0 (0.0%) |
|  | Total | 564 | 211 (37.4%) | 250 (44.3%) | 85 (15.1%) | 10 (1.8%) | 8 (1.4%) |
| 3 | A | 229 | 60 (26.2%) | 89 (38.9%) | 67 (29.3%) | 6 (2.6%) | 7 (3.1%) |
|  | B | 253 | 53 (20.9%) | 112 (44.3%) | 77 (30.4%) | 7 (2.8%) | 4 (1.6%) |
|  | C | 59 | 14 (23.7%) | 25 (42.4%) | 16 (27.1%) | 3 (5.1%) | 1 (1.7%) |
|  | Total | 541 | 127 (23.5%) | 226 (41.8%) | 160 (29.6%) | 16 (3.0%) | 12 (2.2%) |
| 4 | A | 209 | 45 (21.5%) | 75 (35.9%) | 77 (36.8%) | 6 (2.9%) | 6 (2.9%) |
|  | B | 238 | 41 (17.2%) | 99 (41.6%) | 85 (35.7%) | 7 (2.9%) | 6 (2.5%) |
|  | C | 54 | 10 (18.5%) | 18 (33.3%) | 21 (38.9%) | 3 (5.6%) | 2 (3.7%) |
|  | Total | 501 | 96 (19.2%) | 192 (38.3%) | 183 (36.5%) | 16 (3.2%) | 14 (2.8%) |
| 5 | A | 209 | 44 (21.1%) | 66 (31.6%) | 86 (41.1%) | 8 (3.8%) | 5 (2.4%) |
|  | B | 229 | 38 (16.6%) | 91 (39.7%) | 85 (37.1%) | 9 (3.9%) | 6 (2.6%) |
|  | C | 51 | 7 (13.7%) | 19 (37.3%) | 22 (43.1%) | 3 (5.9%) | 0 (0.0%) |
|  | Total | 489 | 89 (18.2%) | 176 (36.0%) | 193 (39.5%) | 20 (4.1%) | 11 (2.2%) |
| 6 | A | 206 | 41 (19.9%) | 68 (33.0%) | 86 (41.7%) | 6 (2.9%) | 5 (2.4%) |
|  | B | 225 | 34 (15.1%) | 87 (38.7%) | 91 (40.4%) | 9 (4.0%) | 4 (1.8%) |
|  | C | 47 | 7 (14.9%) | 18 (38.3%) | 20 (42.6%) | 2 (4.3%) | 0 (0.0%) |
|  | Total | 478 | 82 (17.2%) | 173 (36.2%) | 197 (41.2%) | 17 (3.6%) | 9 (1.9%) |
| 7 | A | 190 | 36 (18.9%) | 59 (31.1%) | 78 (41.1%) | 9 (4.7%) | 8 (4.2%) |
|  | B | 197 | 28 (14.2%) | 69 (35.0%) | 87 (44.2%) | 5 (2.5%) | 8 (4.1%) |
|  | C | 39 | 7 (17.9%) | 11 (28.2%) | 16 (41.0%) | 4 (10.3%) | 1 (2.6%) |
|  | Total | 426 | 71 (16.7%) | 139 (32.6%) | 181 (42.5%) | 18 (4.2%) | 17 (4.0%) |
| 8 | A | 185 | 35 (18.9%) | 57 (30.8%) | 79 (42.7%) | 9 (4.9%) | 5 (2.7%) |
|  | B | 181 | 24 (13.3%) | 64 (35.4%) | 84 (46.4%) | 5 (2.8%) | 4 (2.2%) |
|  | C | 38 | 7 (18.4%) | 11 (28.9%) | 14 (36.8%) | 4 (10.5%) | 2 (5.3%) |
|  | Total | 404 | 66 (16.3%) | 132 (32.7%) | 177 (43.8%) | 18 (4.5%) | 11 (2.7%) |
| 9 | A | 180 | 35 (19.4%) | 51 (28.3%) | 78 (43.3%) | 9 (5.0%) | 7 (3.9%) |
|  | B | 175 | 22 (12.6%) | 60 (34.3%) | 81 (46.3%) | 6 (3.4%) | 6 (3.4%) |
|  | C | 36 | 5 (13.9%) | 11 (30.6%) | 15 (41.7%) | 4 (11.1%) | 1 (2.8%) |
|  | Total | 391 | 62 (15.9%) | 122 (31.2%) | 174 (44.5%) | 19 (4.9%) | 14 (3.6%) |
| 10 | A | 170 | 33 (19.4%) | 48 (28.2%) | 75 (44.1%) | 9 (5.3%) | 5 (2.9%) |
|  | B | 169 | 21 (12.4%) | 51 (30.2%) | 83 (49.1%) | 6 (3.6%) | 8 (4.7%) |
|  | C | 34 | 5 (14.7%) | 8 (23.5%) | 15 (44.1%) | 2 (5.9%) | 4 (11.8%) |
|  | Total | 373 | 59 (15.8%) | 107 (28.7%) | 173 (46.4%) | 4.6%) | 17 (4.6%) |

Data are shown as n (%). *Temporary discontinuation
